# Supplementary material for: A Systematic Review of Repeat Fecal Occult Blood Tests for Colorectal Cancer Screening
Source: Oxford University Press journal article supplement (doi:10.1158/1055-9965.epi-19-0775), 2019-11-18
Supplement: 10559965epi190775-sup-219608_3_supp_5847489_pzqbcy.docx [file 10559965epi190775-sup-219608_3_supp_5847489_pzqbcy.docx]

| **Supplementary Table 1.** **Completeness of reporting across categories of representativeness, intervention, outcome ascertainment, follow-up, and eligibility** | | | | | | | | | |
| --- | --- | --- | --- | --- | --- | --- | --- | --- | --- |
|  | | | | | | | | | |
|  | Representativeness | | Intervention | Outcome Ascertainment | | Follow-up Period | | Eligibility | |
| Author, year | Screening age, average risk1 | Population-based2 | Described test type | Defined repeat FOBT | Used EHR, registry, or gov’t data (not self-report) | Reported follow-up period | Assessed ≥3 screening rounds | Reported number eligible at each round | Reported number lost to follow-up, died or diagnosed with CRC, or received colonoscopy |
| Tazi, 1997 40 | N | N | N | Y | Y | Y | Y | Y | N |
| Weller, 2007 39 | N | Y | Y | Y | Y | Y | N | Y | Y |
| Fenton, 2010 16 | Y | N | Y | Y | Y | Y | N | I | Y |
| Janda, 2010 38 | I | Y | N | Y | Y | Y | N | Y | I |
| Gellad, 2011 53 | Y | N | N | Y | Y | Y | Y | I | Y |
| Cole, 2012 27 | N | Y | Y | Y | Y | Y | N | Y | I |
| Crotta, 2012 52 | Y | Y | Y | Y | Y | Y | Y | Y | I |
| Garcia, 2012 37 | Y | Y | N | Y | Y | Y | N | Y | N |
| Liss, 2013 35 | Y | N | N | Y | Y | Y | N | Y | N |
| Bae, 2014 25 | N | N | N | Y | N | Y | Y | N | N |
| Baker, 2014 36 | Y | N | Y | Y | Y | Y | N | Y | Y |
| Duncan, 2014 51 | Y | N | Y | Y | Y | Y | Y | N | I |
| McNamara, 2014 28 | Y | N | Y | Y | Y | Y | N | Y | Y |
| Steele, 2014 34 | N | Y | Y | Y | Y | Y | Y | I | I |
| Wong, 2014 30; Wong, 2013 31 | Y | N | Y | Y | Y | Y | Y | Y | N |
| Baker, 2015 26 | Y | N | Y | Y | Y | Y | N | Y | Y |
| Bujanda, 2015 33 | Y | Y | Y | Y | Y | Y | N | Y | Y |
| Denis, 2015 50; Pornet 2014 54 | Y | Y | Y | Y | Y | Y | Y | Y | I |
| Lo, 2015 29; Lo, 2016 75; Lo, 2015 76 | N | Y | Y | Y | Y | Y | Y | Y | Y |
| Schlichting, 2015 32 | Y | N | Y | Y | Y | Y | N | Y | Y |
| Paszat, 2016 43 | Y | N | Y | Y | Y | Y | N | Y | N |
| Telford, 2016 42 | Y | Y | Y | Y | Y | Y | N | Y | N |
| Knudsen, 2017 41 | Y | N | N | Y | Y | Y | N | Y | Y |
| Singal, 2017 48 | Y | N | Y | Y | Y | Y | Y | N | Y |
| van der Vlugt, 2017 49; Denters, 2013 77; Grobbee, 2017 78 | Y | Y | Y | Y | Y | Y | Y | I | Y |
| Saraste, 2018 46 | N | Y | Y | Y | Y | Y | Y | Y | Y |
| Singal, 2018 20; Jensen, 2016 6; Gordon, 2015 21 | Y | N | N | Y | Y | Y | N | N | I |
